# Supplementary material
Source: HighWire-hosted journal article supplement (https://innovations.bmj.com/content/3/4/227)
Supplement: inline-supplementary-material-1 [file inline-supplementary-material-1.docx]

(contest OR contests OR contesting OR crowdsourcing OR crowdsourcing OR crowd sourced OR crowdsource OR crowdsourced OR Competitive Behavior OR social media OR social media OR Social marketing OR social networking)

(campaigns OR campaign OR Inventions OR innovation OR innovative OR creation OR creations OR video games OR video games OR video game OR computer games OR computer game OR gaming OR video OR videos OR photography OR photo OR photos OR photographs OR algorithms OR algorithm OR create OR creates OR creating OR creative)

(Global Health OR Global Health OR Public Health OR Public Health OR Community Health OR Health Behavior OR Health Behavior OR Health Behaviour OR Health Promotion OR Health Promotion OR Disease Prevention OR Health Message OR prevention OR Health Knowledge Attitudes Practice)
