# Supplementary material
Source: HighWire-hosted journal article supplement (https://innovations.bmj.com/content/3/4/227)
Supplement: inline-supplementary-material-2 [file inline-supplementary-material-2.docx]

**Study Quality Scores**

| Lead author | Defined target  population | Probability  Sampling | Sample characteristics  Match target population | Sufficient  Response | Standardized data collection | Reliability of data collection instrument | Validity of data collection instrument | Appropriate statistical methods | Total |
| --- | --- | --- | --- | --- | --- | --- | --- | --- | --- |
| Cella | 1 | 0.5 | 1 | 1 | 1 | 1 | 1 | 1 | 7.5 |
| Croghan | 1 | 0 | 1 | 1 | 1 | 1 | 1 | 0.5 | 6.5 |
| Dawson | 1 | 0 | 1 | 0.5 | 1 | 1 | 1 | 1 | 6.5 |
| Keller | 1 | 0 | 0.5 | 1 | 0.5 | 0.5 | 0.5 | 0 | 4 |
| Merchant | 1 | 0.5 | 1 | 1 | 1 | 1 | 1 | 0.5 | 7 |
| Sczerputowski | 1 | 0.5 | 1 | 0.5 | 1 | 1 | 1 | 0.5 | 6.5 |
| Costello- DREAM | 1 | 0 | 0.5 | 1 | 1 | 1 | 1 | 1 | 6.5 |
| Costello-CLARITY | 1 | 0 | 0.5 | 1 | 1 | 1 | 1 | 1 | 6.5 |
| Kuffner | 1 | 0.5 | 1 | 1 | 1 | 1 | 1 | 1 | 7.5 |
| Lakhani | 1 | 0.5 | 1 | 1 | 1 | 1 | 1 | 1 | 7.5 |
| Tang | 1 | 0.5 | 1 | 1 | 1 | 1 | 1 | 1 | 7.5 |
| Tang | 1 | 0.5 | 1 | 1 | 1 | 1 | 1 | 1 | 7.5 |
